# Supplementary material for: Maximising camera trap data: Using attractants to improve detection of elusive species in multi-species surveys
Source: PubMed Central journal article supplement (PMC6541258; doi:10.1371/journal.pone.0216447), 2019-05-29
Supplement: pone.0216447.s001.pdf [file pone.0216447.s001.pdf]

**S1 Table.** Full model sets exploring the influence of attractant freshness, the total length a station was left in place, and an incremental measure of how long a station had been active on each occasion. In order to understand how attractants influenced detection in the short-term, we used an occasion length of 1 day. We tested the influence of these covariates on seven small carnivores and three prey species in Kibale National Park, Uganda, in 2013 – 2014.

| Detection covariates            | K | AICc    | $\Delta$ AICc | ModelLik | AICcWt | LL       |
|---------------------------------|---|---------|---------------|----------|--------|----------|
| <b>African golden cat</b>       |   |         |               |          |        |          |
| Total effort                    | 3 | 1812.94 | 0.000         | 1.000    | 0.457  | -903.37  |
| Null                            | 2 | 1814.70 | 1.760         | 0.415    | 0.189  | -905.30  |
| Attractant + Total effort       | 4 | 1815.06 | 2.128         | 0.345    | 0.158  | -903.37  |
| Incremental effort              | 3 | 1816.05 | 3.116         | 0.211    | 0.096  | -904.93  |
| Attractant                      | 3 | 1816.77 | 3.837         | 0.147    | 0.067  | -905.29  |
| Attractant + Incremental effort | 4 | 1818.18 | 5.243         | 0.073    | 0.033  | -904.93  |
| <b>Serval</b>                   |   |         |               |          |        |          |
| Null                            | 2 | 446.38  | 0.000         | 1.000    | 0.411  | -221.14  |
| Incremental effort              | 3 | 447.99  | 1.611         | 0.447    | 0.184  | -220.90  |
| Attractant                      | 3 | 448.45  | 2.065         | 0.356    | 0.147  | -221.13  |
| Total effort                    | 3 | 448.48  | 2.097         | 0.350    | 0.144  | -221.14  |
| Attractant + Incremental effort | 4 | 450.12  | 3.735         | 0.155    | 0.064  | -220.89  |
| Attractant + Total effort       | 4 | 450.58  | 4.197         | 0.123    | 0.050  | -221.13  |
| <b>African palm civet</b>       |   |         |               |          |        |          |
| Attractant                      | 3 | 1293.22 | 0.000         | 1.000    | 0.464  | -643.51  |
| Attractant + Total effort       | 4 | 1293.67 | 0.449         | 0.799    | 0.370  | -642.67  |
| Attractant + Incremental effort | 4 | 1295.28 | 2.058         | 0.357    | 0.166  | -643.47  |
| Total effort                    | 3 | 1318.64 | 25.420        | 0.000    | 0.000  | -656.22  |
| Null                            | 2 | 1320.46 | 27.246        | 0.000    | 0.000  | -658.18  |
| Incremental effort              | 3 | 1322.48 | 29.258        | 0.000    | 0.000  | -658.14  |
| <b>African civet</b>            |   |         |               |          |        |          |
| Attractant + Total effort       | 4 | 2760.15 | 0.000         | 1.000    | 0.753  | -1375.91 |
| Attractant                      | 3 | 2764.04 | 3.896         | 0.143    | 0.107  | -1378.92 |
| Total effort                    | 3 | 2764.54 | 4.390         | 0.111    | 0.084  | -1379.17 |
| Attractant + Incremental effort | 4 | 2765.52 | 5.376         | 0.068    | 0.051  | -1378.60 |
| Null                            | 2 | 2770.83 | 10.682        | 0.005    | 0.004  | -1383.37 |
| Incremental effort              | 3 | 2772.73 | 12.582        | 0.002    | 0.001  | -1383.27 |

| Detection covariates            | K | AICc    | $\Delta$ AICc | ModelLik | AICcWt | LL       |
|---------------------------------|---|---------|---------------|----------|--------|----------|
| <b>Servaline genet</b>          |   |         |               |          |        |          |
| Null                            | 2 | 3732.56 | 0.000         | 1.000    | 0.305  | -1864.23 |
| Total effort                    | 3 | 3733.24 | 0.674         | 0.714    | 0.218  | -1863.52 |
| Incremental effort              | 3 | 3733.63 | 1.062         | 0.588    | 0.180  | -1863.72 |
| Attractant                      | 3 | 3734.25 | 1.686         | 0.430    | 0.131  | -1864.03 |
| Attractant + Increm effort      | 4 | 3735.16 | 2.596         | 0.273    | 0.083  | -1863.42 |
| Attractant + Total effort       | 4 | 3735.19 | 2.621         | 0.270    | 0.082  | -1863.43 |
| <b>Rusty-spotted genet</b>      |   |         |               |          |        |          |
| Attractant + Total effort       | 4 | 3601.81 | 0.000         | 1.000    | 1.000  | -1796.74 |
| Total effort                    | 3 | 3619.71 | 17.896        | 0.000    | 0.000  | -1806.76 |
| Attractant + Incremental effort | 4 | 3628.05 | 26.239        | 0.000    | 0.000  | -1809.86 |
| Attractant                      | 3 | 3629.27 | 27.464        | 0.000    | 0.000  | -1811.54 |
| Incremental effort              | 3 | 3652.32 | 50.512        | 0.000    | 0.000  | -1823.06 |
| Null                            | 2 | 3656.32 | 54.510        | 0.000    | 0.000  | -1826.11 |
| <b>Marsh mongoose</b>           |   |         |               |          |        |          |
| Attractant + Total effort       | 4 | 7943.73 | 0.000         | 1.000    | 0.997  | -3967.70 |
| Attractant + Incremental effort | 4 | 7955.39 | 11.654        | 0.003    | 0.003  | -3973.53 |
| Total effort                    | 3 | 7969.27 | 25.532        | 0.000    | 0.000  | -3981.54 |
| Attractant                      | 3 | 7996.99 | 53.258        | 0.000    | 0.000  | -3995.40 |
| Incremental effort              | 3 | 8002.40 | 58.670        | 0.000    | 0.000  | -3998.10 |
| Null                            | 2 | 8035.65 | 91.915        | 0.000    | 0.000  | -4015.78 |
| <b>Blue duiker</b>              |   |         |               |          |        |          |
| Attractant + Incremental effort | 4 | 3303.02 | 0.000         | 1.000    | 0.999  | -1647.34 |
| Attractant                      | 3 | 3318.53 | 15.510        | 0.000    | 0.000  | -1656.17 |
| Attractant + Total effort       | 4 | 3320.06 | 17.046        | 0.000    | 0.000  | -1655.87 |
| Incremental effort              | 3 | 3325.91 | 22.899        | 0.000    | 0.000  | -1659.86 |
| Null                            | 2 | 3337.18 | 34.163        | 0.000    | 0.000  | -1666.54 |
| Total effort                    | 3 | 3337.65 | 34.637        | 0.000    | 0.000  | -1665.73 |
| <b>Red duiker</b>               |   |         |               |          |        |          |
| Attractant + Incremental effort | 4 | 3649.81 | 0.000         | 1.000    | 0.935  | -1820.74 |
| Attractant + Total effort       | 4 | 3655.56 | 5.751         | 0.056    | 0.053  | -1823.61 |
| Attractant                      | 3 | 3658.48 | 8.672         | 0.013    | 0.012  | -1826.14 |
| Incremental effort              | 3 | 3682.37 | 32.564        | 0.000    | 0.000  | -1838.09 |
| Null                            | 2 | 3686.34 | 36.534        | 0.000    | 0.000  | -1841.12 |
| Total effort                    | 3 | 3687.43 | 37.629        | 0.000    | 0.000  | -1840.62 |

| Detection covariates            | K | AICc    | $\Delta$ AICc | ModelLik | AICcWt | LL       |
|---------------------------------|---|---------|---------------|----------|--------|----------|
| <b>Giant forest rat</b>         |   |         |               |          |        |          |
| Null                            | 2 | 2368.68 | 0.000         | 1.000    | 0.259  | -1182.29 |
| Attractant                      | 3 | 2368.87 | 0.192         | 0.909    | 0.235  | -1181.34 |
| Incremental effort              | 3 | 2369.73 | 1.053         | 0.591    | 0.153  | -1181.77 |
| Attractant + Total effort       | 4 | 2370.11 | 1.433         | 0.489    | 0.126  | -1180.89 |
| Attractant + Incremental effort | 4 | 2370.22 | 1.539         | 0.463    | 0.120  | -1180.95 |
| Total effort                    | 3 | 2370.45 | 1.766         | 0.414    | 0.107  | -1182.13 |
