# Supplementary material for: Maximising camera trap data: Using attractants to improve detection of elusive species in multi-species surveys
Source: PubMed Central journal article supplement (PMC6541258; doi:10.1371/journal.pone.0216447), 2019-05-29
Supplement: pone.0216447.s002.pdf [file pone.0216447.s002.pdf]

**S2 Table.** Short term changes in detection following placement of attractants for seven carnivores and three prey species documented during three surveys in Kibale National Park, Uganda in 2013 - 2014. Two -tailed probability was calculated using a standard permutation test. Detection rates that differ significantly from random predictions are highlighted in bold. P-values < 0.025 suggest reduced station use and values > 0.975 suggest increased station use. We restricted analysis to 7 days after replacement of attractants in order to focus on short term responses.

|                           | Day 1        | Day 2        | Day 3 | Day 4 | Day 5 | Day 6        | Day 7 |
|---------------------------|--------------|--------------|-------|-------|-------|--------------|-------|
| <b>African golden cat</b> |              |              |       |       |       |              |       |
| Photographic events       | 14           | 22           | 23    | 25    | 29    | 32           | 20    |
| Observed det prob         | 0.085        | 0.133        | 0.139 | 0.152 | 0.176 | 0.194        | 0.121 |
| Random det prob           | 0.149        | 0.148        | 0.148 | 0.148 | 0.142 | 0.139        | 0.125 |
| p-value                   | <b>0.004</b> | 0.298        | 0.379 | 0.564 | 0.889 | <b>0.971</b> | 0.451 |
| <b>Serval</b>             |              |              |       |       |       |              |       |
| Photographic events       | 5            | 6            | 6     | 1     | 4     | 3            | 2     |
| Observed det prob         | 0.185        | 0.222        | 0.222 | 0.037 | 0.148 | 0.111        | 0.074 |
| Random det prob           | 0.151        | 0.152        | 0.149 | 0.146 | 0.144 | 0.133        | 0.124 |
| p-value                   | 0.704        | 0.847        | 0.835 | 0.030 | 0.534 | 0.372        | 0.197 |
| <b>African palm civet</b> |              |              |       |       |       |              |       |
| Photographic events       | 28           | 30           | 24    | 15    | 13    | 4            | 10    |
| Observed det prob         | 0.226        | 0.242        | 0.194 | 0.121 | 0.105 | 0.032        | 0.081 |
| Random det prob           | 0.150        | 0.148        | 0.146 | 0.147 | 0.143 | 0.141        | 0.123 |
| p-value                   | <b>0.987</b> | <b>0.995</b> | 0.911 | 0.226 | 0.126 | <b>0.001</b> | 0.092 |
| <b>African civet</b>      |              |              |       |       |       |              |       |
| Photographic events       | 52           | 60           | 62    | 50    | 54    | 33           | 34    |
| Observed det prob         | 0.151        | 0.174        | 0.18  | 0.145 | 0.157 | 0.096        | 0.099 |
| Random det prob           | 0.151        | 0.150        | 0.150 | 0.148 | 0.142 | 0.138        | 0.121 |
| p-value                   | 0.495        | 0.886        | 0.931 | 0.440 | 0.782 | <b>0.013</b> | 0.093 |
| <b>Servaline genet</b>    |              |              |       |       |       |              |       |
| Photographic events       | 45           | 70           | 55    | 67    | 48    | 50           | 48    |
| Observed det prob         | 0.117        | 0.183        | 0.144 | 0.175 | 0.125 | 0.131        | 0.125 |
| Random det prob           | 0.148        | 0.148        | 0.149 | 0.146 | 0.144 | 0.138        | 0.126 |
| p-value                   | 0.041        | 0.961        | 0.391 | 0.942 | 0.138 | 0.312        | 0.453 |

|                            | Day 1        | Day 2        | Day 3        | Day 4        | Day 5       | Day 6        | Day 7 |
|----------------------------|--------------|--------------|--------------|--------------|-------------|--------------|-------|
| <b>Rusty-spotted genet</b> |              |              |              |              |             |              |       |
| Photographic events        | 111          | 93           | 89           | 89           | 64          | 79           | 66    |
| Observed det prob          | 0.188        | 0.157        | 0.151        | 0.151        | 0.108       | 0.134        | 0.112 |
| Random det prob            | 0.154        | 0.152        | 0.151        | 0.149        | 0.141       | 0.134        | 0.120 |
| p-value                    | <b>0.989</b> | 0.628        | 0.496        | 0.558        | <b>0.01</b> | 0.497        | 0.274 |
| <b>Marsh mongoose</b>      |              |              |              |              |             |              |       |
| Photographic events        | 213          | 237          | 250          | 228          | 207         | 183          | 161   |
| Observed det prob          | 0.144        | 0.16         | 0.169        | 0.154        | 0.14        | 0.124        | 0.109 |
| Random det prob            | 0.149        | 0.148        | 0.147        | 0.147        | 0.144       | 0.141        | 0.124 |
| p-value                    | 0.291        | 0.886        | <b>0.986</b> | 0.737        | 0.314       | 0.027        | 0.055 |
| <b>Blue duiker</b>         |              |              |              |              |             |              |       |
| Photographic events        | 33           | 40           | 53           | 61           | 49          | 52           | 50    |
| Observed det prob          | 0.098        | 0.118        | 0.157        | 0.180        | 0.145       | 0.154        | 0.148 |
| Random det prob            | 0.148        | 0.149        | 0.148        | 0.148        | 0.144       | 0.139        | 0.124 |
| p-value                    | <b>0.003</b> | 0.044        | 0.683        | 0.955        | 0.527       | 0.802        | 0.911 |
| <b>Red duiker</b>          |              |              |              |              |             |              |       |
| Photographic events        | 36           | 35           | 43           | 64           | 53          | 59           | 47    |
| Observed det prob          | 0.107        | 0.104        | 0.128        | 0.190        | 0.157       | 0.175        | 0.139 |
| Random det prob            | 0.147        | 0.148        | 0.148        | 0.147        | 0.143       | 0.141        | 0.125 |
| p-value                    | <b>0.014</b> | <b>0.006</b> | 0.118        | <b>0.991</b> | 0.781       | 0.969        | 0.803 |
| <b>Giant forest rat</b>    |              |              |              |              |             |              |       |
| Photographic events        | 43           | 44           | 41           | 35           | 29          | 22           | 26    |
| Observed det prob          | 0.179        | 0.183        | 0.171        | 0.146        | 0.121       | 0.092        | 0.108 |
| Random det prob            | 0.148        | 0.147        | 0.147        | 0.145        | 0.144       | 0.141        | 0.128 |
| p-value                    | 0.899        | 0.931        | 0.853        | 0.500        | 0.159       | <b>0.012</b> | 0.187 |
