# Supplementary material for: Maximising camera trap data: Using attractants to improve detection of elusive species in multi-species surveys
Source: PubMed Central journal article supplement (PMC6541258; doi:10.1371/journal.pone.0216447), 2019-05-29

**S1 Fig A.** Plots showing the relationship between detection probability and attractant freshness for seven small carnivores in Kibale National Park, Uganda, in 2013 – 2014.

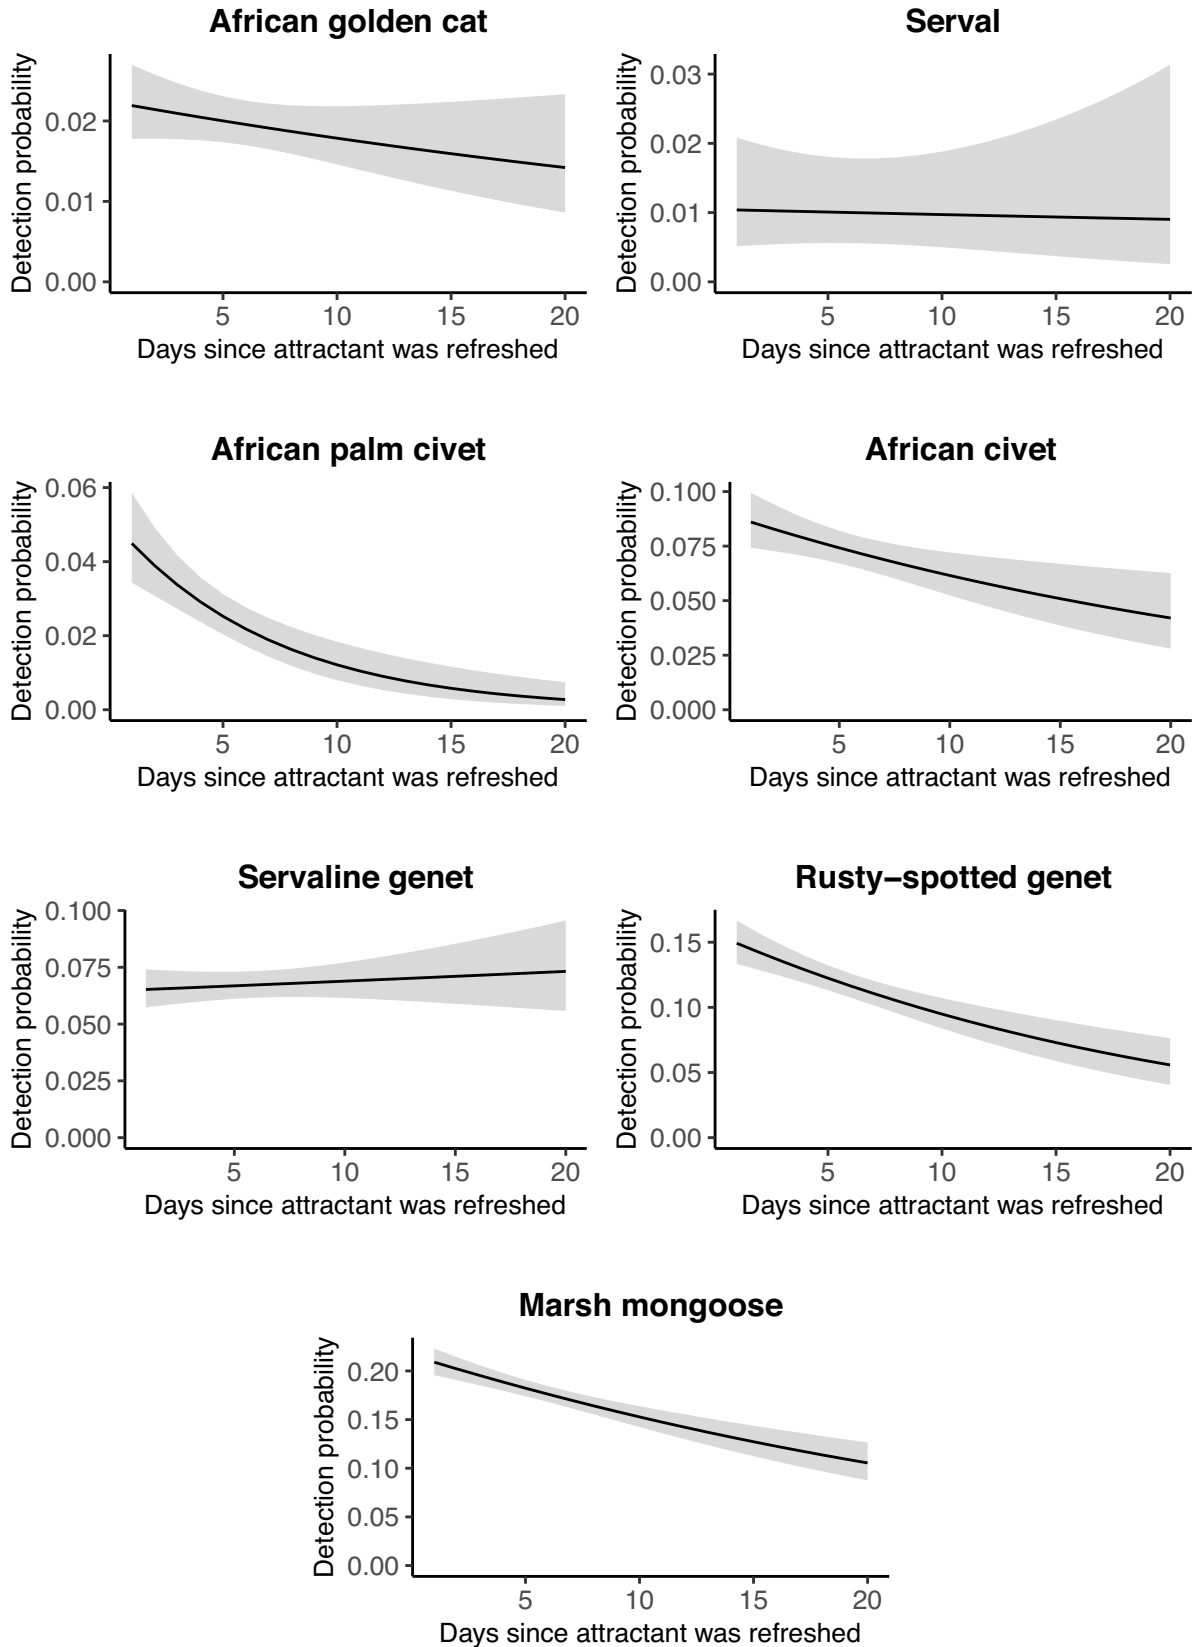

**S1 Fig B.** Plots showing the relationship between detection probability and attractant freshness for three African golden cat prey species in Kibale National Park, Uganda, in 2013 – 2014.

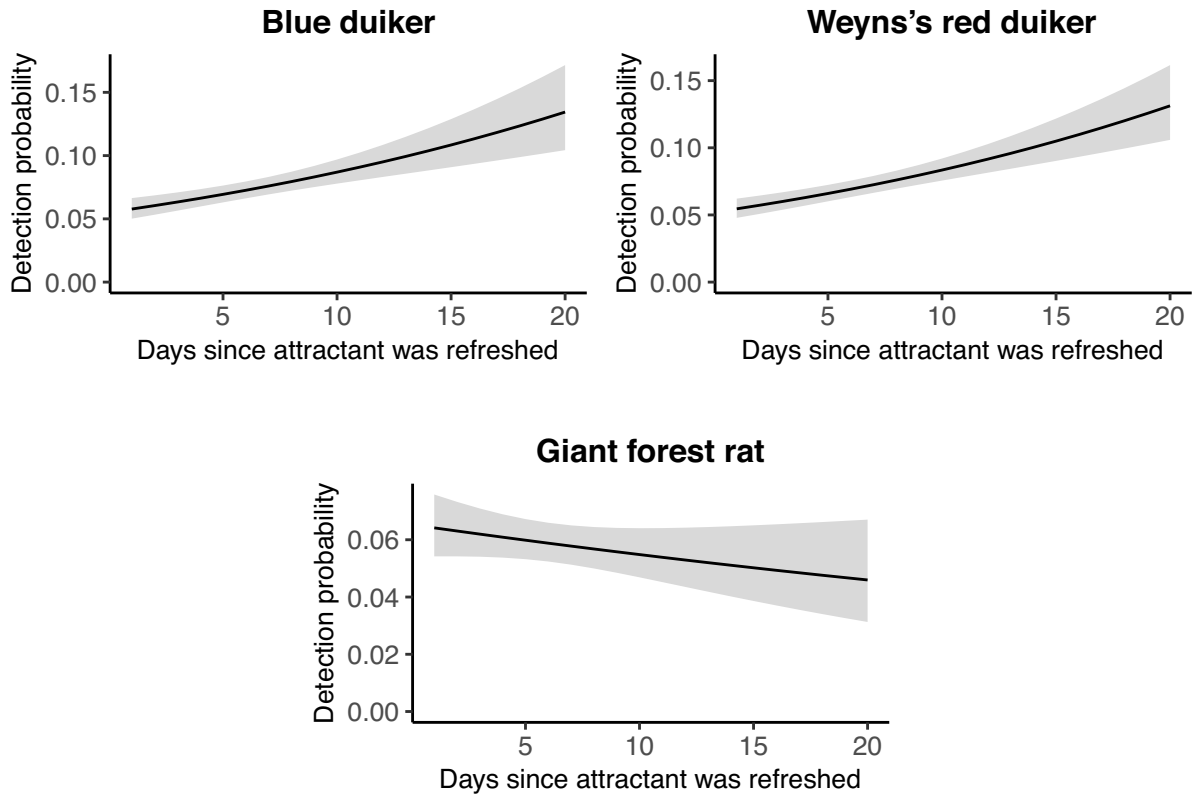

Supplement: pone.0216447.s003.pdf [file pone.0216447.s003.pdf]
