# Supplementary material for: Maximising camera trap data: Using attractants to improve detection of elusive species in multi-species surveys
Source: PubMed Central journal article supplement (PMC6541258; doi:10.1371/journal.pone.0216447), 2019-05-29

**S3 Fig A.** Plots showing the relationship between detection probability and incremental effort (the number of days a station has been active on each consecutive day) for seven small carnivores in Kibale National Park, Uganda, in 2013 – 2014.

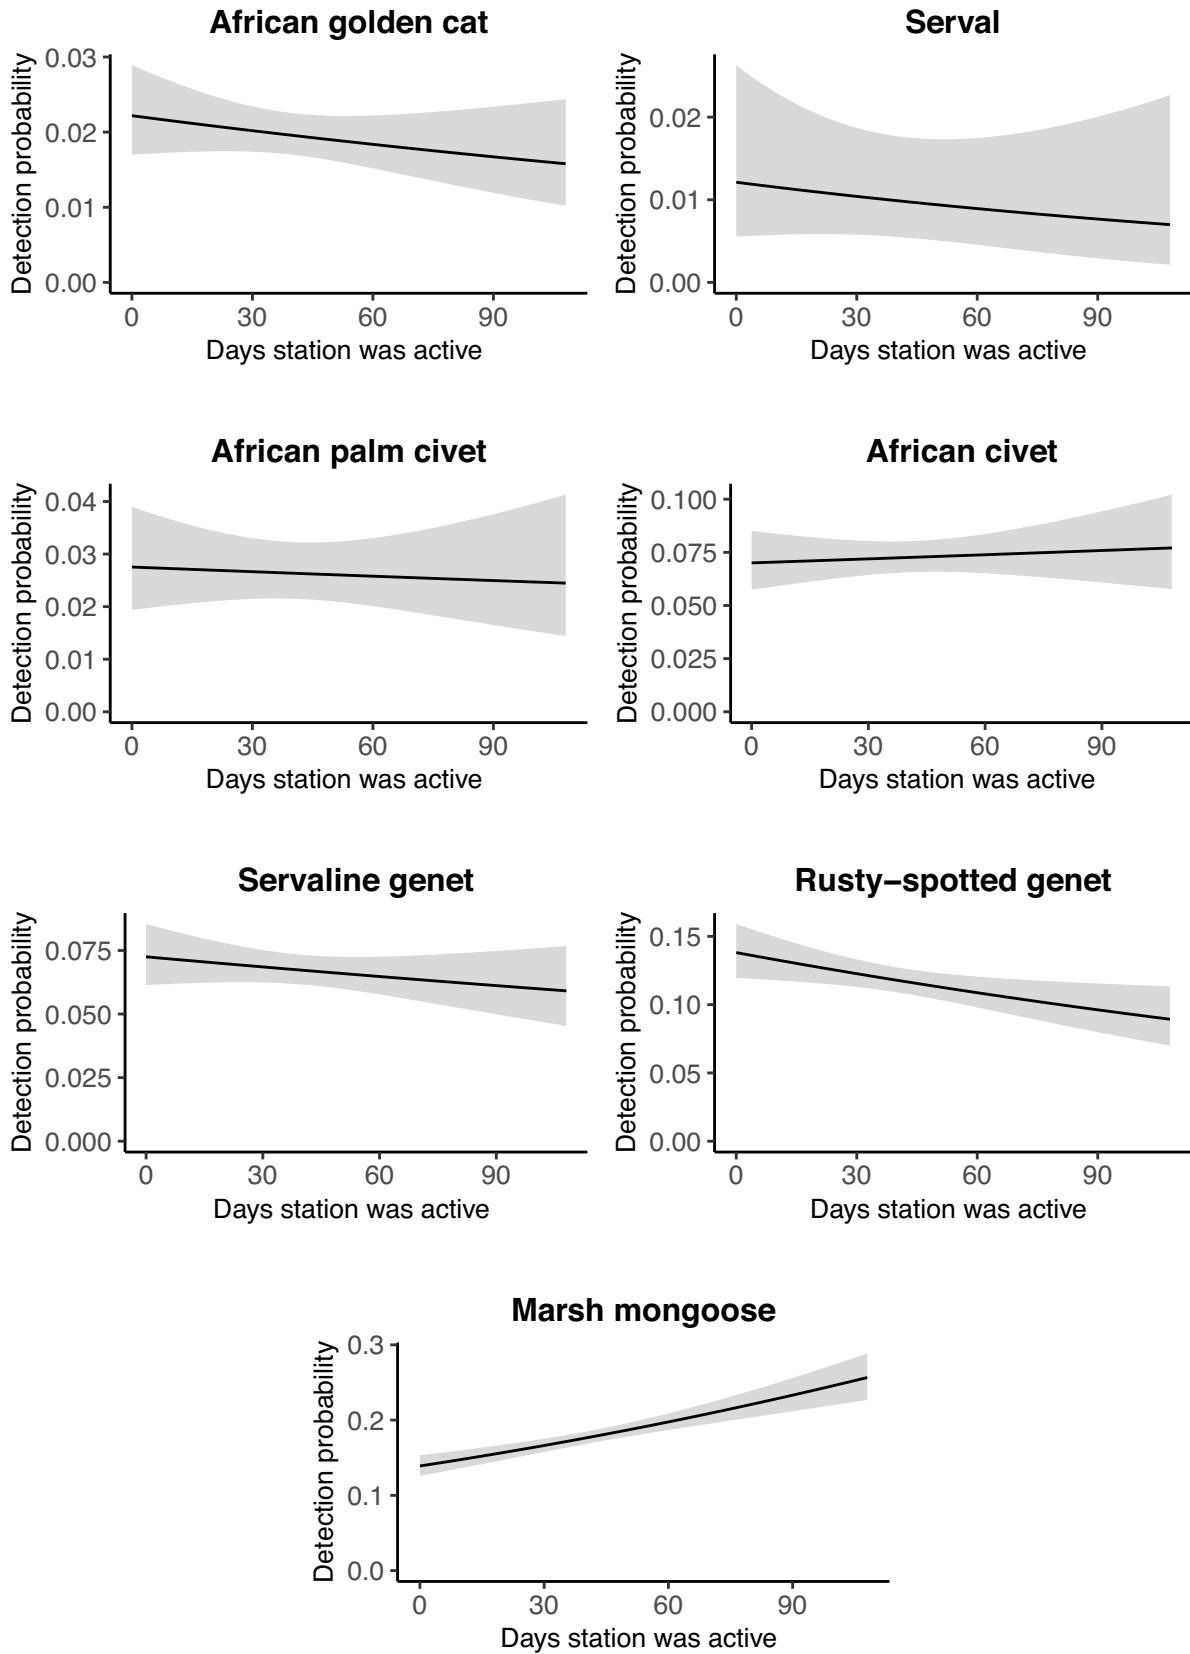

**S4 Fig B.** Plots showing the relationship between detection probability and incremental effort (the number of days a station has been active on each consecutive day) for three African golden cat prey species in Kibale National Park, Uganda, in 2013 – 2014.

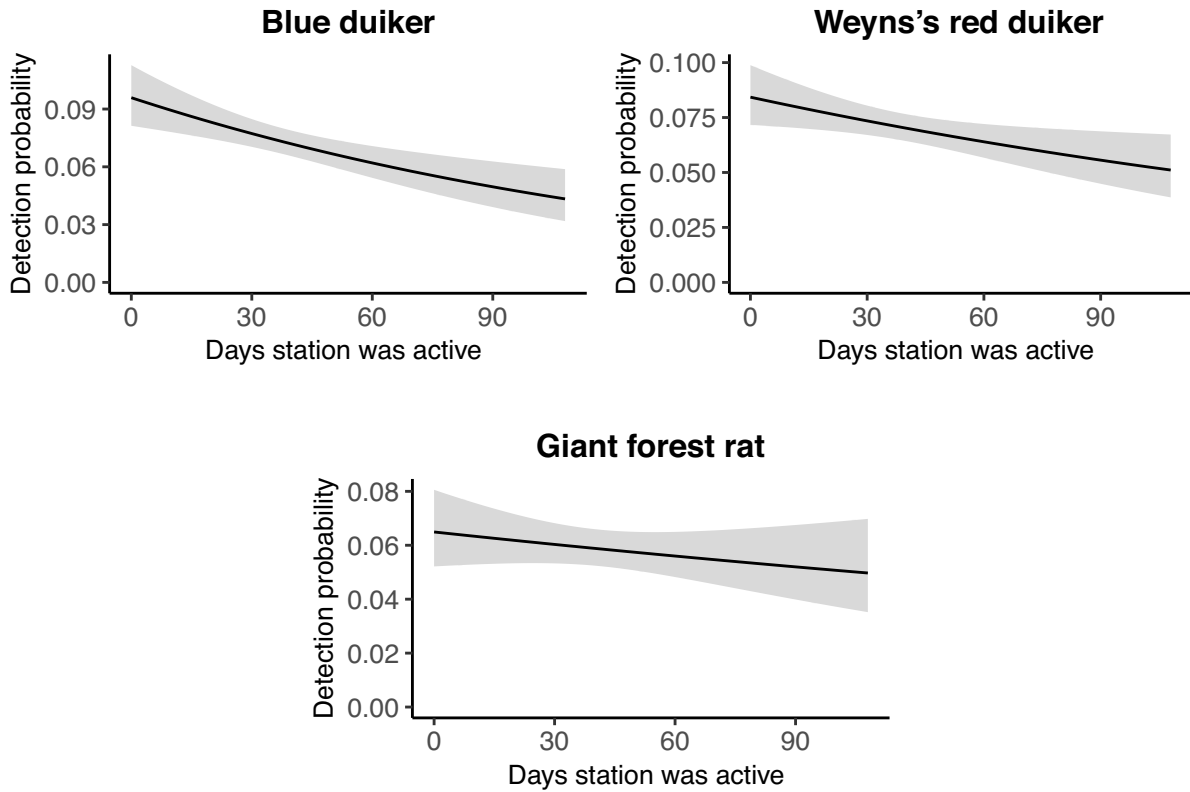

Supplement: pone.0216447.s005.pdf [file pone.0216447.s005.pdf]
